# Supplementary material
Source: PubMed Central journal article supplement (PMC7583591)
Supplement: mmc1.pdf [file mmc1.pdf]

## Supplementary Information

### *Supplementary 1: Selection of 300 Compounds*

**Table S1: List of the 300 compounds that were used in this *in silico* study. Their binding affinities from Schrödinger (Glide Energy) and AutoDock Vina (Binding Affinity) are provided.**

| <b>Ligands</b>                                        | <b>Glide Energy<br/>(kcal/mol)</b> | <b>Binding<br/>Affinity<br/>(kcal/mol)</b> | <b>OliveNet™</b> |
|-------------------------------------------------------|------------------------------------|--------------------------------------------|------------------|
| Jaspolyanoside                                        | -82.0                              | -8.5                                       | ✓                |
| Saquinavir                                            | -77.7                              | -7.9                                       |                  |
| Isojaspolyoside A                                     | -77.5                              | -8.1                                       | ✓                |
| Jaspolyoside                                          | -77.5                              | -7.8                                       | ✓                |
| Quercetin 3-O-rutinoside                              | -77.0                              | -9.4                                       | ✓                |
| Verbascoside                                          | -76.3                              | -8.5                                       | ✓                |
| Isoacteoside                                          | -75.1                              | -9.2                                       | ✓                |
| Ligstroside derivative 5                              | -73.4                              | -7.4                                       | ✓                |
| Luteolin-3',7-O-diglucoside                           | -71.7                              | -8.5                                       | ✓                |
| Ritonavir                                             | -71.5                              | -7.6                                       |                  |
| Oxidized verbascoside                                 | -71.2                              | -8.1                                       | ✓                |
| β-Hydroxy verbascoside                                | -71.1                              | -8.6                                       | ✓                |
| Ligstroside derivative 4                              | -71.0                              | -7.8                                       | ✓                |
| Oleucine B                                            | -70.6                              | -5.8                                       | ✓                |
| Acteoside                                             | -70.4                              | -8.6                                       | ✓                |
| Orbanchoside                                          | -70.3                              | -8.3                                       | ✓                |
| Scolymoside                                           | -69.7                              | -7.6                                       | ✓                |
| Hellicoside                                           | -69.4                              | -7.9                                       | ✓                |
| Ligstroside derivative 3                              | -69.3                              | -7.7                                       | ✓                |
| Rutin                                                 | -69.3                              | -7.8                                       | ✓                |
| 7"-S-Hydroxyoleuropein                                | -68.9                              | -7.5                                       | ✓                |
| Neo-nüzhenide                                         | -68.8                              | -7.8                                       | ✓                |
| 4'-O-β-D-Glucosyl-9-O-(6"-<br>deoxysaccharosyl)olivil | -67.9                              | -8.1                                       | ✓                |
| Suspensaside                                          | -67.7                              | -8.8                                       | ✓                |
| β-Hydroxy-acteoside                                   | -67.7                              | -8.6                                       | ✓                |
| Oleucine A                                            | -67.3                              | -7.9                                       | ✓                |
| 10-Hydroxyoleuropein                                  | -66.7                              | -7.6                                       | ✓                |
| Luteolin-7,4-O-diglucoside                            | -66.3                              | -8.3                                       | ✓                |
| Oleuropein diglucoside                                | -66.3                              | -7.2                                       | ✓                |
| Suramin                                               | -66.3                              | -10.7                                      |                  |
| Isoverbascoside                                       | -66.2                              | -9.1                                       | ✓                |
| Apigenin-7-O-rutinoside                               | -66.1                              | -8.6                                       | ✓                |
| Lucidumoside C                                        | -66.0                              | -7.8                                       | ✓                |
| Nüzhenide 11-Methyl oleoside                          | -65.3                              | -8.4                                       | ✓                |
| Isorhoifolin                                          | -65.3                              | -8.6                                       | ✓                |
| Nelfinavir                                            | -65.2                              | -8.3                                       |                  |

|                                              |       |      |   |
|----------------------------------------------|-------|------|---|
| Oleuropein-3'-O- $\beta$ -D-glucopyranoside  | -64.6 | -7.3 | ✓ |
| Amikacin                                     | -64.5 | -6.1 |   |
| (-)-Epicatechin gallate                      | -64.1 | -8.2 |   |
| Hesperidin                                   | -64.0 | -8.8 | ✓ |
| Oleuropein-3"-Methyl ether                   | -63.6 | -7.8 | ✓ |
| Cyanidin-3-O-glucoside                       | -62.7 | -8.7 | ✓ |
| Demethyloleuropein                           | -62.5 | -8.2 | ✓ |
| Demethyloleuropein (1-shaped)                | -62.5 | -7.9 | ✓ |
| Oxidized isoverbascoside                     | -62.4 | -9.1 | ✓ |
| Oleuroside-10-carboxylic acid                | -61.9 | -7.9 | ✓ |
| Nüzhenide                                    | -61.8 | -8.8 | ✓ |
| D,L-Sulforaphane glutathione                 | -61.7 | -6.3 |   |
| Luteolin-8-C-glucoside                       | -61.2 | -8.8 | ✓ |
| Quercitrin                                   | -60.7 | -8.9 | ✓ |
| Quercetin-3-O-glucoside                      | -60.6 | -8.2 | ✓ |
| Dihydro-oleuropein                           | -60.5 | -7.1 | ✓ |
| Ceftazidime                                  | -60.5 | -7.7 |   |
| SRT2104                                      | -60.5 | -8.6 |   |
| SRT1720                                      | -60.5 | -9.1 |   |
| Quercetin-3-rhamnoside                       | -60.1 | -8.8 | ✓ |
| Nüzhenide oleoside                           | -60.1 | -8.1 | ✓ |
| Cyanidin-3-O-rutinoside                      | -60.0 | -8.8 | ✓ |
| Oleuropein                                   | -59.6 | -8.0 | ✓ |
| Simeprevir                                   | -59.4 | -8.5 |   |
| Oleuroside                                   | -59.1 | -7.6 | ✓ |
| Quercetin-7-O-glucoside                      | -58.4 | -8.6 | ✓ |
| Delphinidin-3-O-glucoside                    | -58.3 | -8.3 | ✓ |
| Darunavir                                    | -58.2 | -7.1 |   |
| Luteolin-6-C-glucoside                       | -58.1 | -7.8 | ✓ |
| Ligstroside                                  | -58.1 | -7.9 | ✓ |
| Remdesivir                                   | -58.0 | -7.5 |   |
| 10-Hydroxy oleuropein aglycone               | -56.7 | -7.2 | ✓ |
| Ligstroside-3'-O- $\beta$ -D-glucopyranoside | -56.6 | -7.4 | ✓ |
| Luteolin-4'-O-rutinoside                     | -56.5 | -8.9 | ✓ |
| Wedelosin                                    | -56.2 | -7.2 | ✓ |
| Lopinavir                                    | -56.2 | -8.0 |   |
| Ligstroside derivative 2                     | -56.2 | -6.9 | ✓ |
| Hydroxytyrosol diglucoside                   | -56.0 | -8.2 | ✓ |
| Ceftriaxone                                  | -55.9 | -8.1 |   |
| Luteolin-7-O-glucoside                       | -55.7 | -8.3 | ✓ |
| Ligstroside derivative 1                     | -55.3 | -7.5 | ✓ |
| Luteolin-4'-O-glucoside                      | -55.0 | -7.6 | ✓ |
| Luteolin-7-O-rutinoside                      | -54.9 | -8.3 | ✓ |
| Elenolic acid diglucoside                    | -54.9 | -7.4 | ✓ |
| Vicenin-2                                    | -54.8 | -8.4 | ✓ |
| Demethylligstroside                          | -54.1 | -7.4 | ✓ |

|                                                                            |       |       |   |
|----------------------------------------------------------------------------|-------|-------|---|
| Apigenin-7-O-glucoside                                                     | -53.8 | -8.0  | ✓ |
| Oleuropeindial - Lactone (Cannizzaro-like product of oleuropeindial)       | -53.3 | -7.3  | ✓ |
| Caffeoyl-6'-secologanoside                                                 | -53.1 | -7.8  | ✓ |
| 6'- $\beta$ -D-Glucopyranosyl oleoside                                     | -53.0 | -8.3  | ✓ |
| (+)-Fraxiresinol-1- $\beta$ -D-glucopyranoside                             | -52.6 | -7.9  | ✓ |
| (+)-1-Acetoxypinoresinol-4'- $\beta$ -D-glucopyranoside-4''-O-methyl ether | -52.0 | -7.3  | ✓ |
| (+)-1-Hydroxypinoresinol-4''-O-methyl ether                                | -52.0 | -7.3  | ✓ |
| Hydroxytyrosil elenolate                                                   | -52.0 | -7.2  | ✓ |
| Indinavir                                                                  | -52.0 | -8.2  |   |
| Hypericin                                                                  | -51.7 | -10.2 |   |
| Cefotaxime                                                                 | -51.4 | -7.2  |   |
| Comselogoside                                                              | -51.1 | -8.1  | ✓ |
| Tobramycin                                                                 | -51.1 | -5.9  |   |
| 3-Acetyloxy berchemol                                                      | -50.9 | -6.7  | ✓ |
| Esculin                                                                    | -50.6 | -7.4  | ✓ |
| Chrysoeriol-7-O-glucoside                                                  | -50.4 | -8.1  | ✓ |
| 6'-Rhamnopyranosyl oleoside                                                | -50.3 | -7.7  | ✓ |
| Curcumin                                                                   | -50.3 | -7.4  |   |
| 10-Hydroxy-10-methyl oleuropein aglycone                                   | -50.1 | -6.8  | ✓ |
| Demethoxycurcumin                                                          | -49.8 | -7.5  |   |
| Oleuropeindial (keto form)                                                 | -49.6 | -6.6  | ✓ |
| Hemiacetal of dialdehydic oleuropein aglycone decarboxymethyl              | -49.3 | -6.8  | ✓ |
| 1-Acetoxypinoresinol                                                       | -49.2 | -6.7  | ✓ |
| Ertapenem                                                                  | -48.9 | -7.6  |   |
| Baricitinib                                                                | -48.8 | -8.2  |   |
| (+)-1-Hydroxypinoresinol-4'- $\beta$ -D-glucopyranoside                    | -48.8 | -7.5  | ✓ |
| Demethyloleuropein aglycone (enol form)                                    | -48.8 | -7.4  | ✓ |
| Methoxyluteolin                                                            | -48.7 | -7.6  | ✓ |
| Hydroxytyrosol acyclodihydroelenolate                                      | -48.4 | -6.7  | ✓ |
| Ligstroside aglycone                                                       | -48.4 | -6.8  | ✓ |
| Oleuropeindial (Cannizzaro-like product of oleuropeindial)                 | -48.3 | -7.3  | ✓ |
| Monoaldehydic form of Oleuropein aglycon                                   | -48.1 | -7.3  | ✓ |
| Cefuroxime                                                                 | -47.9 | -6.6  |   |
| 3,4-DHPEA-EDA (Oleuropein-aglycone di-aldehyde)                            | -47.8 | -6.7  | ✓ |
| Syringaresinol                                                             | -47.7 | -7.4  | ✓ |
| Baicalin                                                                   | -47.6 | -8.5  |   |

|                                                                   |       |      |   |
|-------------------------------------------------------------------|-------|------|---|
| Berchemol                                                         | -47.6 | -7.4 | ✓ |
| 3,4-DHPEA-DETA                                                    | -47.6 | -7.1 | ✓ |
| Loganin                                                           | -47.3 | -6.9 | ✓ |
| Rosmarinic acid                                                   | -47.3 | -7.8 | ✓ |
| Delphinidin                                                       | -47.3 | -7.4 | ✓ |
| Hydroxytyrosil-elenolate                                          | -47.1 | -6.8 | ✓ |
| Monoaldehydic form of Ligstroside aglycon                         | -46.9 | -6.9 | ✓ |
| Nafamostat                                                        | -46.7 | -7.7 |   |
| 3,4-DHPEA-DEDA (acetal)                                           | -46.7 | -6.3 | ✓ |
| Oleacein (Dialdehydic form of decarboxymethyl Oleuropein aglycon) | -46.5 | -6.8 | ✓ |
| 10-Hydroxy oleuropein aglycone decarboxymethyl                    | -46.4 | -6.8 | ✓ |
| Caffeoylglucose                                                   | -46.3 | -8.0 | ✓ |
| Oleoside dimethylester                                            | -46.0 | -6.5 | ✓ |
| Ligstroside aglycone methyl acetal                                | -45.9 | -7.4 | ✓ |
| D,L-Sulforaphane N-acetyl-L-cysteine                              | -45.6 | -5.8 |   |
| Hydroxytyrosol-1'- $\beta$ -glucoside                             | -45.3 | -7.2 | ✓ |
| Sulfasalazine                                                     | -45.2 | -8.0 |   |
| Hydroxytyrosol-4- $\beta$ -glucoside                              | -45.0 | -6.8 | ✓ |
| Oleuropein aglycone (3,4-DHPEA-EA)                                | -44.9 | -6.9 | ✓ |
| Oleoside-11-Methylester                                           | -44.9 | -7.3 | ✓ |
| Eriodictyol                                                       | -44.7 | -7.5 | ✓ |
| Secologanoside                                                    | -44.7 | -6.5 | ✓ |
| Oleohydroxypterol                                                 | -44.6 | -6.3 | ✓ |
| Amoxicillin                                                       | -44.3 | -7.8 |   |
| 7-Deoxyloganic acid                                               | -44.2 | -7.3 | ✓ |
| Azithromycin                                                      | -44.0 | -5.5 |   |
| Doripenem                                                         | -44.0 | -7.4 |   |
| Catechin                                                          | -43.8 | -7.2 |   |
| Arbidol                                                           | -43.8 | -6.3 |   |
| (+)-1-Acetoxypinoresinol-4'- $\beta$ -D-glucopyranoside           | -43.7 | -7.4 | ✓ |
| Demethyloleuropein aglycone                                       | -43.7 | -7.4 | ✓ |
| Quercetin                                                         | -43.6 | -7.5 | ✓ |
| Luteolin                                                          | -43.6 | -7.4 | ✓ |
| (+)-Cycloolivil                                                   | -43.5 | -6.7 | ✓ |
| Cornoside                                                         | -43.4 | -7.1 | ✓ |
| Hemiacetal of dialdehydic ligstroside aglycone decarboxymethyl    | -43.3 | -6.2 | ✓ |
| Fangicholine                                                      | -43.3 | -7.4 |   |
| Secologanin                                                       | -43.3 | -6.4 | ✓ |
| Scopolin                                                          | -43.1 | -7.7 | ✓ |
| Hydroxytyrosol-3- $\beta$ -glucoside                              | -43.0 | -6.2 | ✓ |
| 1-oleyltyrosol                                                    | -42.8 | -5.9 | ✓ |

|                                                                       |       |      |   |
|-----------------------------------------------------------------------|-------|------|---|
| Decarboxymethyl ligstroside aglycone                                  | -42.6 | -7.3 | ✓ |
| Hesperitin                                                            | -42.5 | -7.3 | ✓ |
| (+)-1-Acetoxy-pinorexinol-4"-O-methyl ether                           | -42.4 | -6.8 | ✓ |
| Indomethacin                                                          | -42.3 | -7.6 |   |
| Chrysoeriol                                                           | -42.2 | -7.3 | ✓ |
| D,L-Sulforaphane-L-cysteine                                           | -42.2 | -5.2 |   |
| Cepharanthine                                                         | -41.9 | -8.0 |   |
| Elenolic acid glucoside                                               | -41.9 | -6.9 | ✓ |
| Oleocanthal (Dialdehydic form of decarboxymethyl Ligstroside aglycon) | -41.8 | -6.5 | ✓ |
| Chlorogenic acid                                                      | -41.7 | -7.6 | ✓ |
| Naringenin                                                            | -41.5 | -7.7 |   |
| Demethyloleuropein aglycone dialdehyde                                | -41.4 | -7.1 | ✓ |
| Kaempferol                                                            | -41.3 | -7.7 |   |
| Loganic acid                                                          | -41.2 | -7.1 | ✓ |
| Levofloxacin                                                          | -41.1 | -7.3 |   |
| Diosmetin                                                             | -41.0 | -7.4 | ✓ |
| Hydroxytyrosol rhamnoside                                             | -41.0 | -7.0 | ✓ |
| Imipenem                                                              | -40.9 | -6.2 |   |
| Secologanol                                                           | -40.9 | -6.2 | ✓ |
| Ivermectin                                                            | -40.7 | -7.6 |   |
| Pinorexinol                                                           | -40.7 | -7.8 | ✓ |
| Secologanic acid                                                      | -40.7 | -7.6 | ✓ |
| Cyanidin (cation)                                                     | -40.4 | -7.3 | ✓ |
| p-HPEA-EDA                                                            | -40.0 | -6.2 | ✓ |
| Moxifloxacin                                                          | -39.9 | -7.8 |   |
| Disulfiram                                                            | -39.7 | -4.4 |   |
| Ergosterol                                                            | -39.5 | -7.4 |   |
| Tetrandine                                                            | -39.3 | -7.2 |   |
| Chloroquine                                                           | -39.3 | -5.8 |   |
| Apigenin                                                              | -39.3 | -7.7 | ✓ |
| Ciprofloxacin                                                         | -39.1 | -7.7 |   |
| Ampicillin                                                            | -39.1 | -6.7 |   |
| Gingerol                                                              | -39.0 | -5.8 |   |
| Caftaric acid                                                         | -38.3 | -7.3 | ✓ |
| Deoxyloganic acid lauryl ester                                        | -38.3 | -5.6 | ✓ |
| Pterostilbene                                                         | -38.2 | -6.5 |   |
| Salidroside                                                           | -38.2 | -7.0 | ✓ |
| Taxifolin                                                             | -38.2 | -7.4 | ✓ |
| Verucosin                                                             | -38.2 | -7.3 | ✓ |
| 1-(3'-Methoxy-4'-hydroxy)- phenyl-6,7-dihydroxyisochroman             | -37.6 | -7.0 | ✓ |
| Chloroquine Phosphate                                                 | -37.5 | -5.7 |   |
| Meropenem                                                             | -37.4 | -7.0 |   |
| Hydroxychloroquine                                                    | -37.0 | -6.5 |   |

|                                                                    |       |      |   |
|--------------------------------------------------------------------|-------|------|---|
| Dihydrotanshinone                                                  | -36.8 | -7.8 |   |
| Oleoside                                                           | -36.5 | -6.8 | ✓ |
| Linoleic acid                                                      | -36.4 | -5.1 | ✓ |
| Oseltamivir                                                        | -36.4 | -6.2 |   |
| Elaidic acid                                                       | -35.7 | -4.6 | ✓ |
| Penicillin                                                         | -35.5 | -7.3 |   |
| Melatonin                                                          | -35.4 | -6.2 |   |
| Petroselinic acid                                                  | -35.3 | -4.9 | ✓ |
| Emodin                                                             | -34.8 | -7.3 |   |
| Quinine                                                            | -34.7 | -7.0 |   |
| Elenolic acid methylester                                          | -34.2 | -5.6 | ✓ |
| Oleic acid                                                         | -34.0 | -4.9 | ✓ |
| Linoelaidic acid                                                   | -33.9 | -5.2 | ✓ |
| D-(+)-Erythro-1-(4-hydroxy-3-methoxy)-214-phenyl-1,2,3-propantriol | -33.4 | -5.9 | ✓ |
| Shionone                                                           | -33.0 | -7.7 |   |
| Hydroxytyrosol acetate                                             | -32.8 | -5.9 | ✓ |
| Tyrosol acetate                                                    | -32.7 | -5.7 | ✓ |
| 1-Phenyl-6,7-dihydroxyisochroman                                   | -32.7 | -6.7 | ✓ |
| Cis-10-Heptadecenoic Acid                                          | -32.3 | -4.9 | ✓ |
| Ebselen                                                            | -32.2 | -6.5 |   |
| Resveratrol                                                        | -32.0 | -6.9 |   |
| Trans-palmitoleic acid                                             | -31.7 | -4.8 | ✓ |
| Esculetin                                                          | -31.7 | -6.2 | ✓ |
| Sulforaphane                                                       | -31.5 | -3.9 |   |
| Sulfamethoxazole                                                   | -31.2 | -6.7 |   |
| Zingerol                                                           | -30.8 | -5.5 |   |
| Palmitic acid                                                      | -30.7 | -4.5 | ✓ |
| Vaccenic acid                                                      | -30.1 | -5.1 | ✓ |
| Scopoletin                                                         | -29.8 | -5.8 | ✓ |
| Myristic acid                                                      | -29.3 | -4.7 | ✓ |
| Trimethoprim                                                       | -29.2 | -6.4 |   |
| DEDA acetal                                                        | -28.7 | -5.0 | ✓ |
| 2,3-dihydrocaffeic acid                                            | -28.7 | -5.4 | ✓ |
| Margaric acid                                                      | -28.5 | -4.8 | ✓ |
| Homovanillyl alcohol                                               | -28.2 | -5.1 | ✓ |
| Elenolic acid                                                      | -28.2 | -5.7 | ✓ |
| 3,4-Dihydroxyphenylglycol                                          | -28.1 | -5.5 | ✓ |
| Acetaminophen                                                      | -28.1 | -5.2 |   |
| Dialdehydic elenolic ester decarboxymethyl                         | -27.9 | -4.8 | ✓ |
| 3,4,5-Trimethoxybenzoic acid                                       | -27.7 | -5.5 | ✓ |
| Palmitoleic acid                                                   | -27.3 | -5.0 | ✓ |
| 2,5-Dihydroxyphenylacetic acid                                     | -26.9 | -5.3 | ✓ |
| Clavulanic acid                                                    | -26.3 | -6.0 |   |
| Hydroxytyrosol                                                     | -26.3 | -5.2 | ✓ |

|                                                    |       |      |   |
|----------------------------------------------------|-------|------|---|
| Demethyl elenolic acid                             | -26.2 | -5.8 | ✓ |
| Ferulic acid                                       | -26.1 | -5.6 | ✓ |
| Homovanillin                                       | -26.0 | -5.0 | ✓ |
| Lauric acid                                        | -25.9 | -4.7 | ✓ |
| Syringaldehyde                                     | -25.7 | -5.2 | ✓ |
| Syringic acid                                      | -25.5 | -5.5 | ✓ |
| Sinapic acid                                       | -25.4 | -5.8 | ✓ |
| Dialdehydic elenolic acid<br>decarboxymethyl       | -25.4 | -4.7 | ✓ |
| Aspirin                                            | -25.4 | -5.1 |   |
| Hydroxycaffeic acid                                | -25.4 | -5.9 | ✓ |
| m-Coumaric acid                                    | -25.3 | -5.4 | ✓ |
| o-Coumaric acid                                    | -24.5 | -5.2 | ✓ |
| Tyrosol                                            | -24.2 | -4.6 | ✓ |
| Isoeugenol                                         | -24.2 | -5.2 | ✓ |
| Caffeic acid                                       | -24.2 | -7.9 | ✓ |
| 4-Hydroxy-3-methoxy-phenylacetic<br>acid           | -24.0 | -5.4 | ✓ |
| 4-O-methyl-D-glucuronic acid                       | -24.0 | -5.4 | ✓ |
| Quinic acid                                        | -23.9 | -5.4 | ✓ |
| 4-Ethylguaiacol                                    | -23.8 | -4.8 | ✓ |
| Gallic acid                                        | -23.6 | -5.5 | ✓ |
| Dihydro-p-coumaric acid                            | -23.5 | -5.1 | ✓ |
| 4-Hydroxybenzaldehyde                              | -23.4 | -4.6 | ✓ |
| 3,4-Dihydroxyphenylacetic acid                     | -23.4 | -5.6 | ✓ |
| Phloretic acid                                     | -23.1 | -5.2 | ✓ |
| Gentisic acid                                      | -23.0 | -5.2 | ✓ |
| Shikimic acid                                      | -23.0 | -5.3 | ✓ |
| 2,4 dihydroxybenzoic acid                          | -23.0 | -5.3 | ✓ |
| p-cresol                                           | -23.0 | -4.2 | ✓ |
| DEDA (Decarboxymethyl elenolic<br>acid dialdehyde) | -22.9 | -4.8 | ✓ |
| 4-Vinylguaiacol                                    | -22.8 | -4.9 | ✓ |
| Acetylcysteine                                     | -22.7 | -4.6 |   |
| Protocatechuic acid                                | -22.6 | -5.3 | ✓ |
| 4-Vinylphenol                                      | -21.9 | -4.4 | ✓ |
| Fructosamine                                       | -21.9 | -5.0 |   |
| Homovanillic acid                                  | -21.8 | -5.2 | ✓ |
| Guaiacol                                           | -21.5 | -4.5 | ✓ |
| Allicin                                            | -20.9 | -3.7 |   |
| 3,4-Dimethoxybenzoic acid                          | -20.7 | -5.4 | ✓ |
| 2-Methoxy-4-vinylphenol                            | -20.7 | -4.9 | ✓ |
| p-Coumaric acid                                    | -20.7 | -5.2 | ✓ |
| Vanillic acid                                      | -20.7 | -5.3 | ✓ |
| Cinnamic acid                                      | -20.6 | -5.0 | ✓ |
| m-cresol                                           | -20.3 | -4.4 | ✓ |
| 4-Methylcatechol                                   | -20.2 | -5.0 | ✓ |

|                                   |       |      |   |
|-----------------------------------|-------|------|---|
| Homoveratric acid                 | -20.2 | -5.5 | ✓ |
| Menthol                           | -20.0 | -4.7 |   |
| 4-Ethylphenol                     | -19.8 | -4.4 | ✓ |
| 2,6-Dihydroxybenzoic acid         | -19.7 | -5.1 | ✓ |
| Catechol                          | -18.5 | -4.6 | ✓ |
| o-cresol                          | -18.3 | -4.0 | ✓ |
| Patchouli alcohol                 | -17.6 | -5.1 |   |
| Phenol                            | -16.8 | -3.9 | ✓ |
| Metformin                         | -16.7 | -4.7 |   |
| 4-hydroxybenzoic acid             | -16.3 | -4.8 | ✓ |
| $\alpha$ -ketoamide 13b inhibitor | -65.7 | -7.7 |   |



**Supplementary 2: Selection of 30 compounds**

**Table S2: The structures of the 30 compounds that were predicted by the Schrödinger program to bind to the active site of the M<sup>pro</sup> monomer and were selected to undergo blind docking on the M<sup>pro</sup> dimer are provided.**

| Compound   | Classification     | Glide Energies: kcal/mol | Structures                                                                           |
|------------|--------------------|--------------------------|--------------------------------------------------------------------------------------|
| Ritonavir  | Protease inhibitor | -71.5                    | 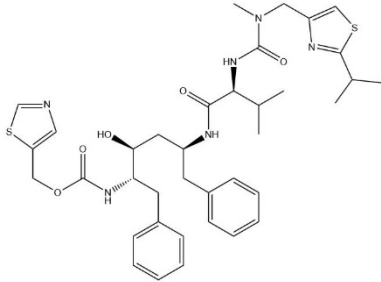  |
| Saquinavir | Protease inhibitor | -77.7                    |   |
| Lopinavir  | Protease inhibitor | -56.2                    |  |
| Indinavir  | Protease inhibitor | -52.0                    |  |

---

Nelfinavir      Protease inhibitor      -65.2

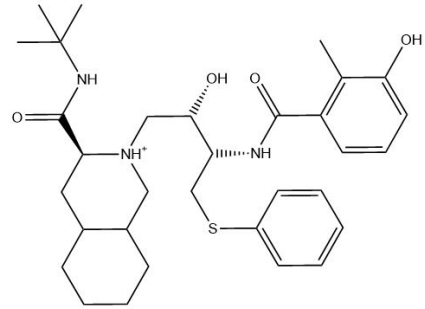

---

Darunavir      Protease inhibitor      -58.2

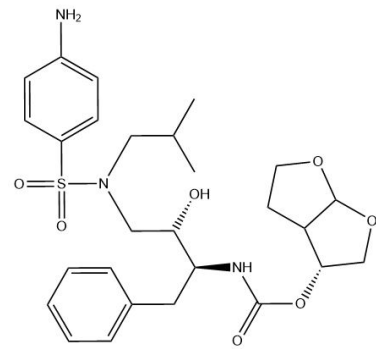

---

Simeprevir      Protease inhibitor      -59.4

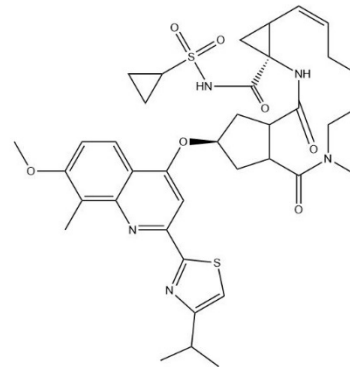

---

Remdesivir      Nucleotide analog      -58.0

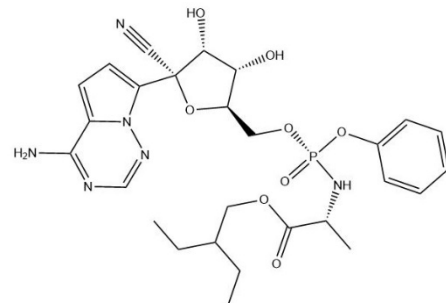

---

Amikacin                      Antibiotic                      -64.5

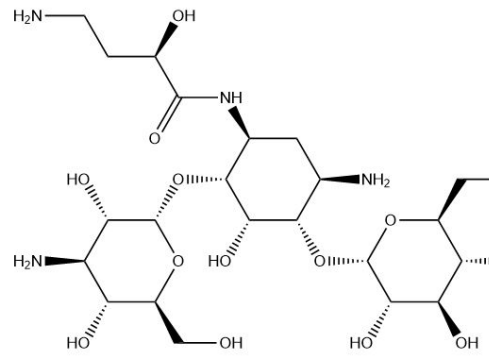

---

Ceftazidime                      Antibiotic                      -60.5

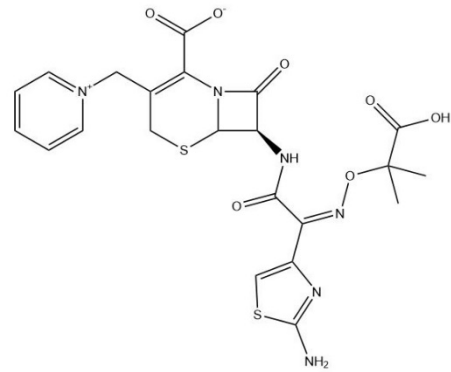

---

Baricitinib                      Janus kinase inhibitor                      -48.8

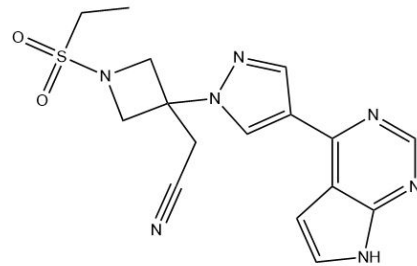

---

Suramin                      Antiparasitic                      -66.3

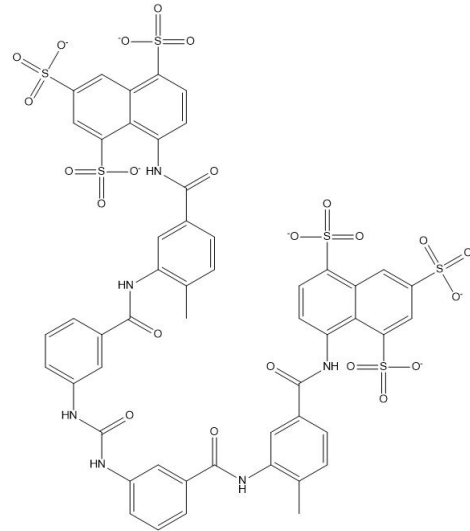

---

Hypericin                      Anthraquinone derivative                      -51.7

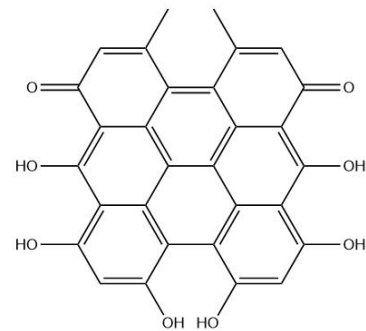

---

Ebselen                      Organoselenium drug                      -32.2

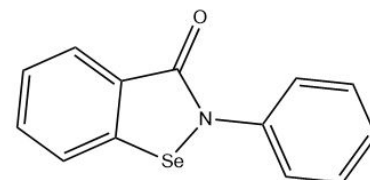

---

Ivermectin                      Anti-parasitic drug                      -40.7

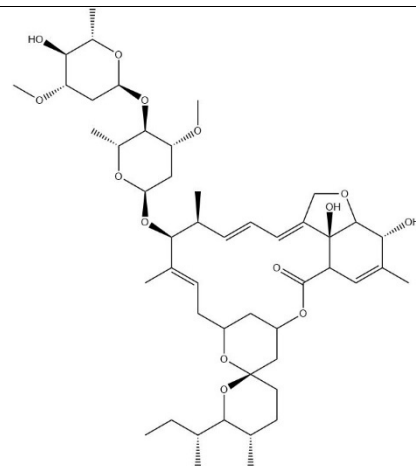

---

SRT2104                      Sirtuin activator                      -60.5

---

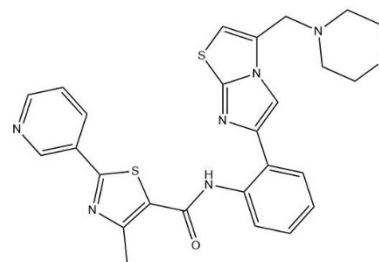

---

SRT1720                      Sirtuin activator                      -60.5

---

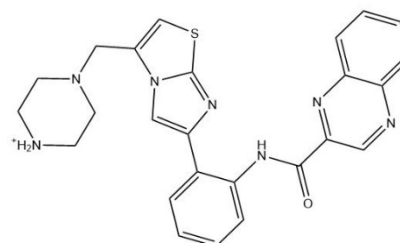

---

D,L-Sulforaphane  
glutathione                      Isothiocyanate  
analog                      -61.7

---

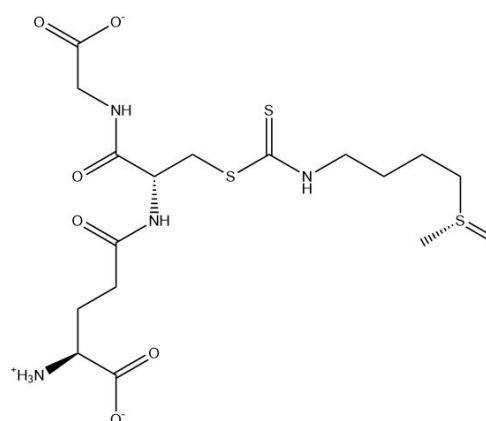

---

(-)-Epicatechin  
gallate                      Natural flavonoid  
compound                      -64.1

---

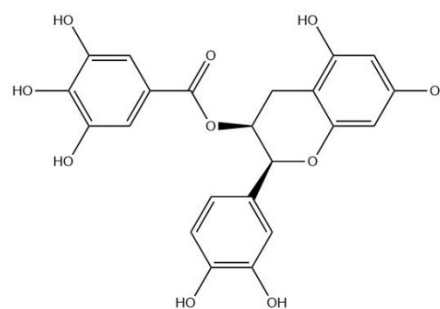



---

Verbascoside OliveNet™ -76.3

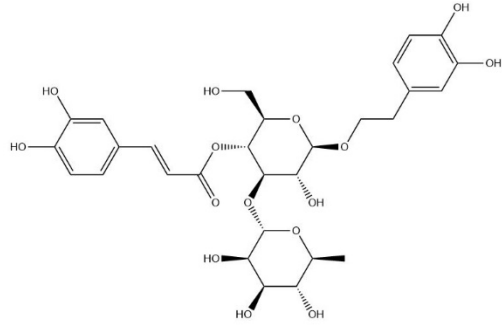

---

Oxidized verbascoside OliveNet™ -71.2

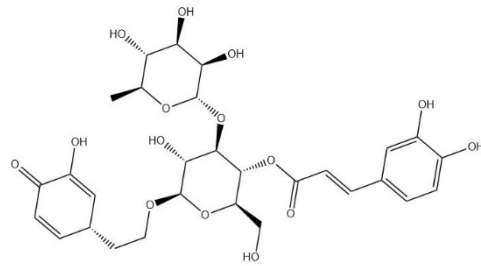

---

Quercetin 3-O-rutinoside OliveNet™ -77.0

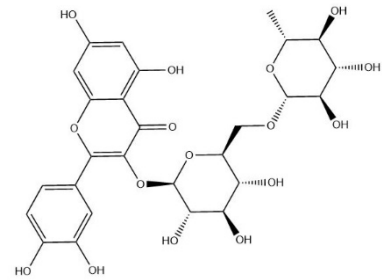

---

Hesperidin OliveNet™ -64.0

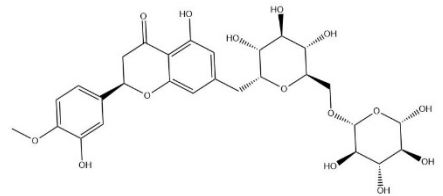

---

Rutin OliveNet™ -69.3

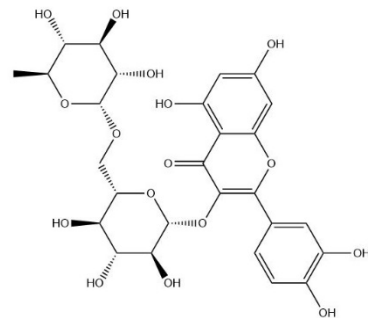

---

Luteolin-7,4-O-  
diglucoside      OliveNet™      -66.3

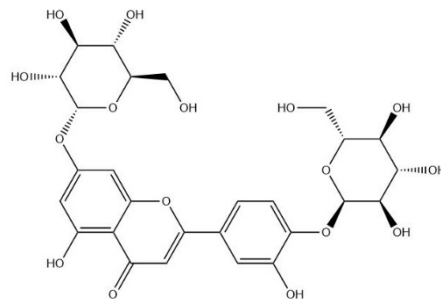

---

Cyanidin-3-O-  
glucoside      OliveNet™      -62.7

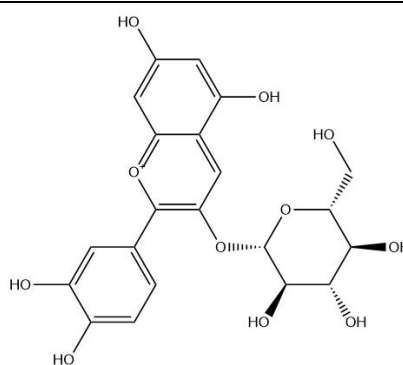



**Supplementary 3: Blind docking results for hypericin, cyanidin-3-O-glucoside and SRT2104**

**Table S3: The blind docking results from AutoDock Vina are provided for the  $\alpha$ -ketoamide inhibitor.**

| <b>Compound:</b>                    |                                 | <b><math>\alpha</math>-ketoamide inhibitor</b> |                                     |                        |
|-------------------------------------|---------------------------------|------------------------------------------------|-------------------------------------|------------------------|
| <b>MONOMER</b>                      |                                 |                                                | <b>DIMER</b>                        |                        |
| <b>Pose Ranking</b>                 | <b>Pose affinity (kcal/mol)</b> | <b>Site of binding</b>                         | <b>Pose affinity (kcal/mol)</b>     | <b>Site of binding</b> |
| 1                                   | -7.7                            | Active                                         | -9.4                                | Allosteric             |
| 2                                   | -7.7                            | Active                                         | -9.4                                | Allosteric             |
| 3                                   | -7.6                            | Active                                         | -9.1                                | Allosteric             |
| 4                                   | -7.6                            | Active                                         | -9.1                                | Allosteric             |
| 5                                   | -7.5                            | Active                                         | -9.1                                | Allosteric             |
| 6                                   | -7.4                            | Active                                         | -9.1                                | Allosteric             |
| 7                                   | -7.4                            | Active                                         | -9.1                                | Allosteric             |
| 8                                   | -7.4                            | Active                                         | -9.1                                | Allosteric             |
| 9                                   | -7.4                            | Active                                         | -9.1                                | Allosteric             |
| 10                                  | -7.3                            | Active                                         | -8.9                                | Allosteric             |
| 11                                  | -7.3                            | Active                                         | -8.9                                | Allosteric             |
| 12                                  | -7.3                            | Active                                         | -8.9                                | Allosteric             |
| 13                                  | -7.3                            | Active                                         | -8.8                                | Allosteric             |
| 14                                  | -7.3                            | Active                                         | -8.8                                | Allosteric             |
| 15                                  | -7.2                            | Allosteric                                     | -8.8                                | Allosteric             |
| 16                                  | -7.2                            | Active                                         | -8.7                                | Active                 |
| 17                                  | -7.2                            | Active                                         | -8.7                                | Allosteric             |
| 18                                  | -7.2                            | Active                                         | -8.7                                | Allosteric             |
| 19                                  | -7.1                            | Allosteric                                     | -8.7                                | Allosteric             |
| 20                                  | -7.1                            | Active                                         | -8.6                                | Allosteric             |
| <b>Total poses in active site =</b> |                                 | <b>18</b>                                      | <b>Total poses in active site =</b> | <b>1</b>               |

**Table S4: The blind docking results from AutoDock Vina are provided for hypericin.**

| <b>Compound:</b>                  |                                 | <b>Hypericin</b>       |                                   |                        |
|-----------------------------------|---------------------------------|------------------------|-----------------------------------|------------------------|
| <b>MONOMER</b>                    |                                 |                        | <b>DIMER</b>                      |                        |
| <b>Pose Ranking</b>               | <b>Pose affinity (kcal/mol)</b> | <b>Site of binding</b> | <b>Pose affinity (kcal/mol)</b>   | <b>Site of binding</b> |
| 1                                 | -9.4                            | Active                 | -10.2                             | Active                 |
| 2                                 | -9.4                            | Active                 | -10.2                             | Active                 |
| 3                                 | -8.6                            | Allosteric             | -10.2                             | Active                 |
| 4                                 | -8.6                            | Allosteric             | -10.2                             | Active                 |
| 5                                 | -8.5                            | Allosteric             | -10.0                             | Allosteric             |
| 6                                 | -8.5                            | Allosteric             | -9.9                              | Allosteric             |
| 7                                 | -8.4                            | Active                 | -9.9                              | Allosteric             |
| 8                                 | -8.4                            | Active                 | -9.9                              | Allosteric             |
| 9                                 | -8.4                            | Allosteric             | -9.8                              | Allosteric             |
| 10                                | -8.4                            | Allosteric             | -9.8                              | Allosteric             |
| 11                                | -8.4                            | Allosteric             | -9.8                              | Allosteric             |
| 12                                | -8.3                            | Allosteric             | -9.8                              | Allosteric             |
| 13                                | -8.3                            | Allosteric             | -9.7                              | Allosteric             |
| 14                                | -8.3                            | Allosteric             | -9.7                              | Allosteric             |
| 15                                | -8.3                            | Allosteric             | -9.7                              | Allosteric             |
| 16                                | -8.3                            | Allosteric             | -9.7                              | Allosteric             |
| 17                                | -8.2                            | Allosteric             | -9.7                              | Allosteric             |
| 18                                | -8.1                            | Allosteric             | -9.7                              | Allosteric             |
| 19                                | -8.0                            | Active                 | -9.7                              | Allosteric             |
| 20                                | -8.0                            | Active                 | -9.7                              | Allosteric             |
| <b>Total poses in active site</b> |                                 | <b>6</b>               | <b>Total poses in active site</b> | <b>4</b>               |
| =                                 |                                 |                        | =                                 |                        |

**Table S5: The blind docking results from AutoDock Vina are provided for cyanidin-3-O-glucoside.**

| <b>Compound:</b>                  |                                 | <b>Cyanidin-3-Oglucoside</b> |                                   |                        |
|-----------------------------------|---------------------------------|------------------------------|-----------------------------------|------------------------|
| <b>MONOMER</b>                    |                                 |                              | <b>DIMER</b>                      |                        |
| <b>Pose Ranking</b>               | <b>Pose affinity (kcal/mol)</b> | <b>Site of binding</b>       | <b>Pose affinity (kcal/mol)</b>   | <b>Site of binding</b> |
| 1                                 | -8.7                            | Active                       | -8.8                              | Active                 |
| 2                                 | -8.7                            | Active                       | -8.8                              | Active                 |
| 3                                 | -8.6                            | Active                       | -8.6                              | Active                 |
| 4                                 | -8.0                            | Active                       | -8.6                              | Active                 |
| 5                                 | -7.9                            | Active                       | -8.5                              | Allosteric             |
| 6                                 | -7.9                            | Active                       | -8.5                              | Allosteric             |
| 7                                 | -7.9                            | Active                       | -8.4                              | Allosteric             |
| 8                                 | -7.8                            | Active                       | -8.4                              | Allosteric             |
| 9                                 | -7.8                            | Active                       | -8.4                              | Allosteric             |
| 10                                | -7.8                            | Active                       | -8.4                              | Allosteric             |
| 11                                | -7.7                            | Active                       | -8.2                              | Active                 |
| 12                                | -7.7                            | Active                       | -8.2                              | Active                 |
| 13                                | -7.6                            | Allosteric                   | -8.2                              | Allosteric             |
| 14                                | -7.5                            | Active                       | -8.2                              | Allosteric             |
| 15                                | -7.5                            | Active                       | -8.1                              | Active                 |
| 16                                | -7.5                            | Active                       | -8.1                              | Allosteric             |
| 17                                | -7.5                            | Active                       | -8.1                              | Allosteric             |
| 18                                | -7.3                            | Active                       | -8.1                              | Allosteric             |
| 19                                | -7.6                            | Active                       | -8.0                              | Allosteric             |
| 20                                | -7.2                            | Active                       | -8.0                              | Allosteric             |
| <b>Total poses in active site</b> |                                 | <b>19</b>                    | <b>Total poses in active site</b> | <b>7</b>               |
| =                                 |                                 |                              | =                                 |                        |

**Table S6: The blind docking results from AutoDock Vina are provided for SRT2104.**

| <b>Compound:</b>                  |                                 | <b>SRT2104</b>         |                                   |                        |
|-----------------------------------|---------------------------------|------------------------|-----------------------------------|------------------------|
| <b>MONOMER</b>                    |                                 |                        | <b>DIMER</b>                      |                        |
| <b>Pose Ranking</b>               | <b>Pose affinity (kcal/mol)</b> | <b>Site of binding</b> | <b>Pose affinity (kcal/mol)</b>   | <b>Site of binding</b> |
| 1                                 | -8.7                            | Active                 | -9.2                              | Active                 |
| 2                                 | -8.4                            | Active                 | -9.2                              | Allosteric             |
| 3                                 | -8.4                            | Active                 | -9.2                              | Active                 |
| 4                                 | -8.4                            | Active                 | -9.2                              | Allosteric             |
| 5                                 | -8.4                            | Active                 | -9.1                              | Allosteric             |
| 6                                 | -8.4                            | Active                 | -9.1                              | Allosteric             |
| 7                                 | -8.2                            | Active                 | -9.1                              | Allosteric             |
| 8                                 | -8.2                            | Active                 | -9.1                              | Allosteric             |
| 9                                 | -8.1                            | Active                 | -8.9                              | Allosteric             |
| 10                                | -8.1                            | Active                 | -8.8                              | Active                 |
| 11                                | -8.0                            | Active                 | -8.8                              | Active                 |
| 12                                | -8.0                            | Active                 | -8.8                              | Allosteric             |
| 13                                | -8.0                            | Active                 | -8.7                              | Allosteric             |
| 14                                | -7.9                            | Active                 | -8.7                              | Allosteric             |
| 15                                | -7.9                            | Allosteric             | -8.7                              | Allosteric             |
| 16                                | -7.9                            | Active                 | -8.7                              | Allosteric             |
| 17                                | -7.9                            | Active                 | -8.6                              | Allosteric             |
| 18                                | -7.9                            | Allosteric             | -8.6                              | Allosteric             |
| 19                                | -7.8                            | Active                 | -8.6                              | Allosteric             |
| 20                                | -7.8                            | Active                 | -8.6                              | Allosteric             |
| <b>Total poses in active site</b> |                                 | <b>18</b>              | <b>Total poses in active site</b> | <b>4</b>               |
| =                                 |                                 |                        | =                                 |                        |

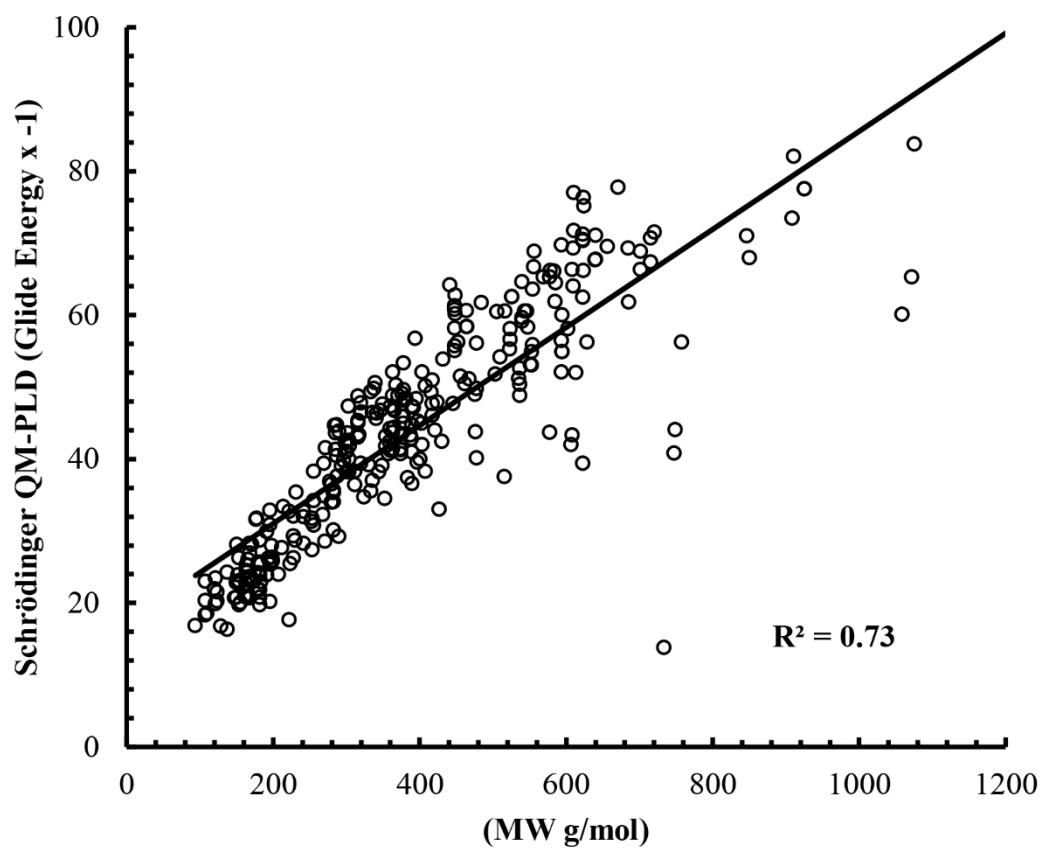

**Figure S1:** Correlation of Schrödinger QM-PLD Glide Energy scores with the molecular weight of the 300 compounds that were used in the initial screen.

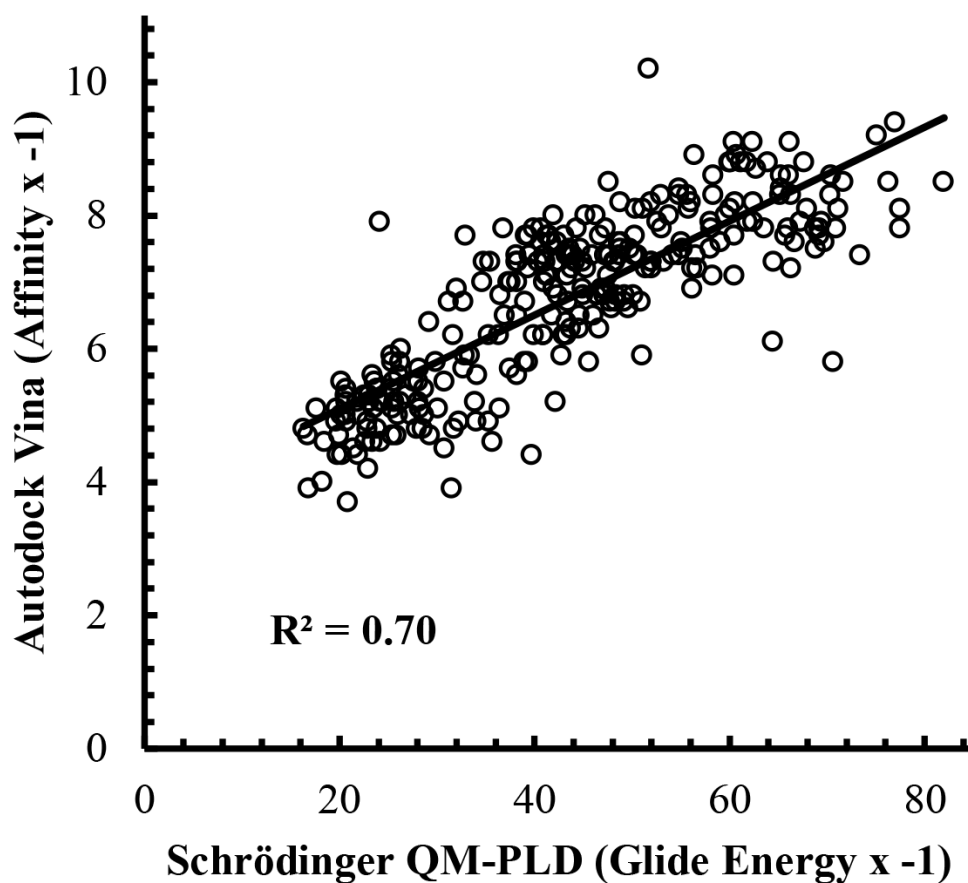

**Figure S2:** Correlation between Schrödinger QM-PLD Glide Energy scores and binding affinity scores from AutoDock Vina for the 300 compounds that were used in the initial screen.

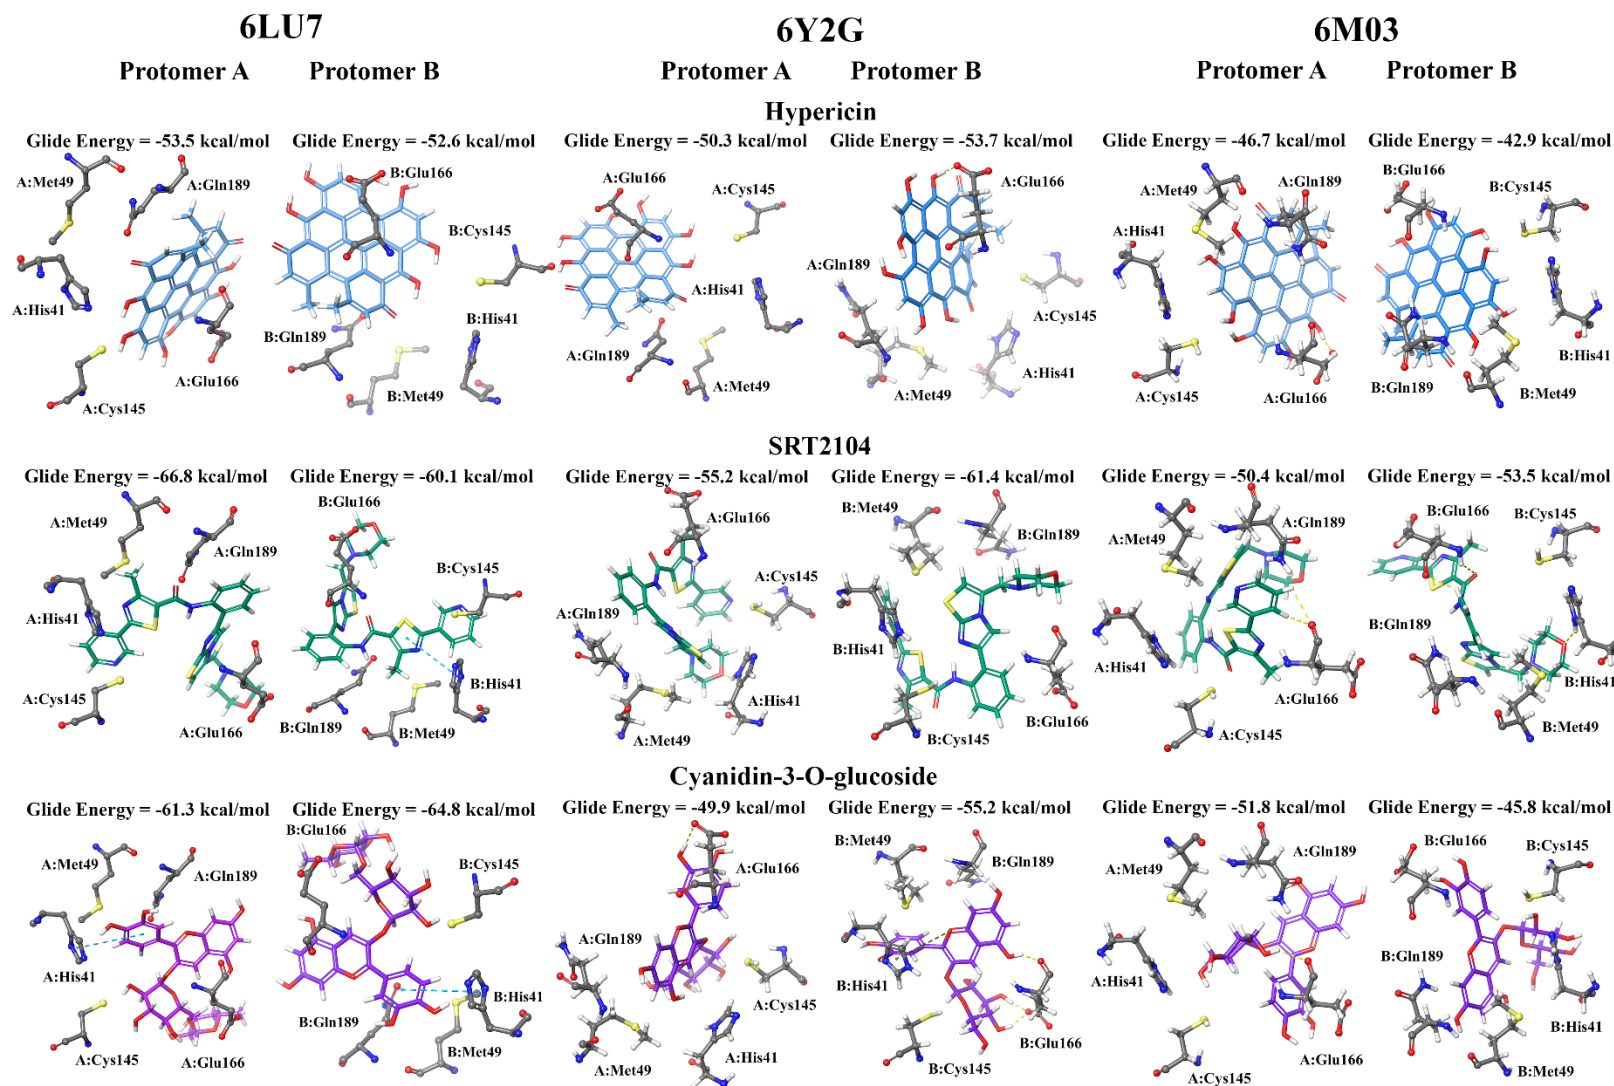

**Figure S1:** Comparison between docking to the active site of SARS-CoV-2 M<sup>pro</sup> structures (PDB ID: 6LU7, 6Y2G, and 6M03) in protomers A and B. Hydrogen bonds are shown as yellow, pi-pi stacking in blue, and pi-cation bonds in green dashed lines.

**Movie S1.** 100 ns trajectory of the apo form of the SARS-CoV-2 main protease

**Movie S2.** 100 ns trajectory of hypericin bound to the active site of the SARS-CoV-2 main protease

**Movie S3.** 100 ns trajectory of SRT2104 bound to the active site of the SARS-CoV-2 main protease

**Movie S4.** 100 ns trajectory of cyanidin-3-O-glucoside bound to the active site of the SARS-CoV-2 main protease
